# Supplementary material for: Building Polymeric Framework Layer for Stable Solid Electrolyte Interphase on Natural Graphite Anode
Source: MDPI journal article supplement (doi:10.3390/molecules27227827), 2022-11-13
Supplement: s1 [file s1]

# Building Polymeric Framework Layer for Stable Solid Electrolyte Interphase on Natural Graphite Anode

Yunhao Zhao <sup>1</sup>, Yueyue Wang <sup>1</sup>, Rui Liang <sup>2,\*</sup>, Guobin Zhu <sup>1,3,\*</sup>,  
Weixing Xiong <sup>1,3</sup> and Honghe Zheng <sup>1,3,\*</sup>

<sup>1</sup> College of Energy, Soochow University, Suzhou 215006, China

<sup>2</sup> Sunwoda Electronic Co., Ltd., Shenzhen 518100, China

<sup>3</sup> Suzhou Huaying New Energy Materials and Technology Co., Ltd., Suzhou 215100, China

\* Correspondence: liangrui@sunwoda.com (R.L.); gbzhu@suda.edu.cn (G.Z.); hhzheng@suda.edu.cn (H.Z.)

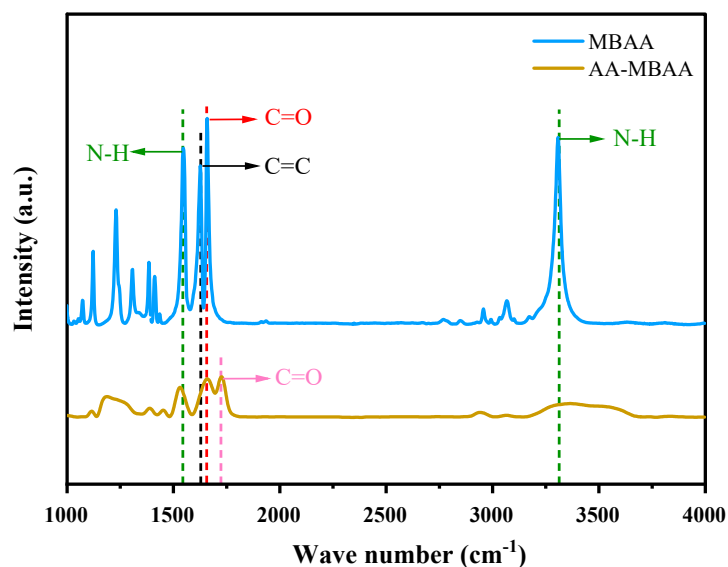

**Figure S1.** The FTIR spectra of the pure MBAA particles and AA-MBAA polymer.

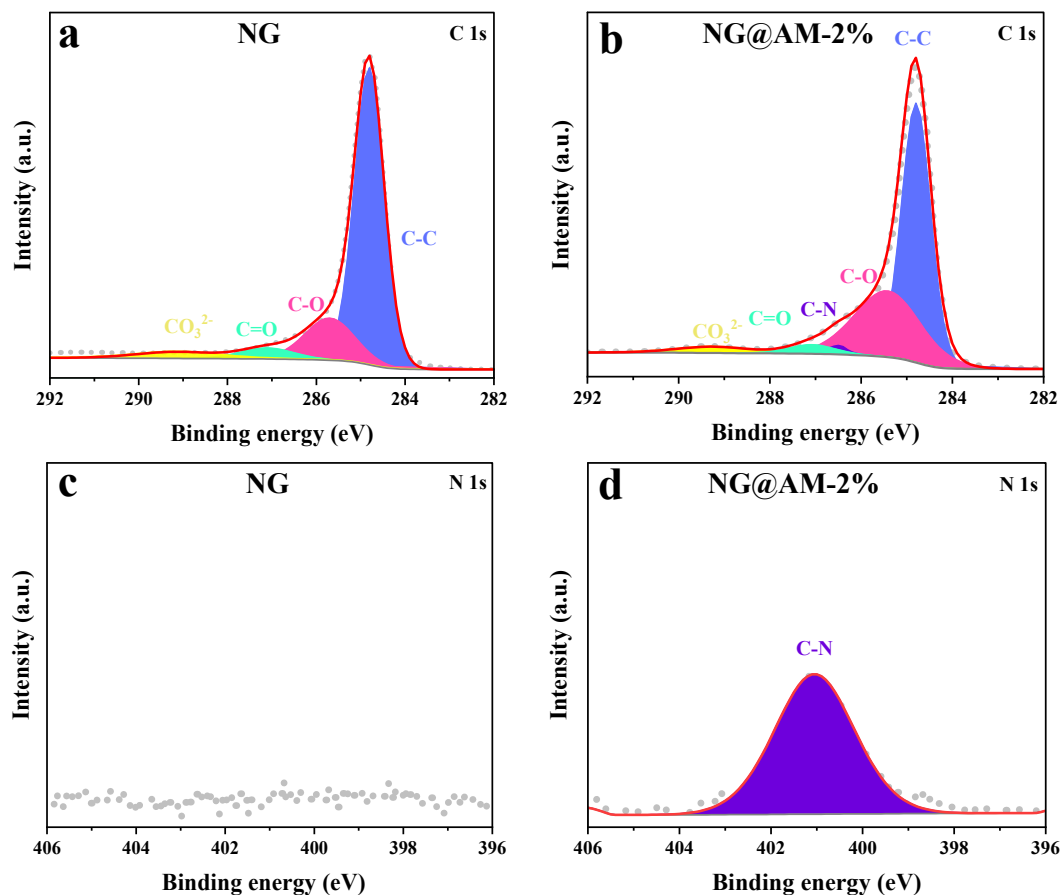

**Figure S2.** XPS spectra with fitted results for the pristine NG and NG@AM-2% electrodes: (a, b) C 1s and (c, d) N 1s.

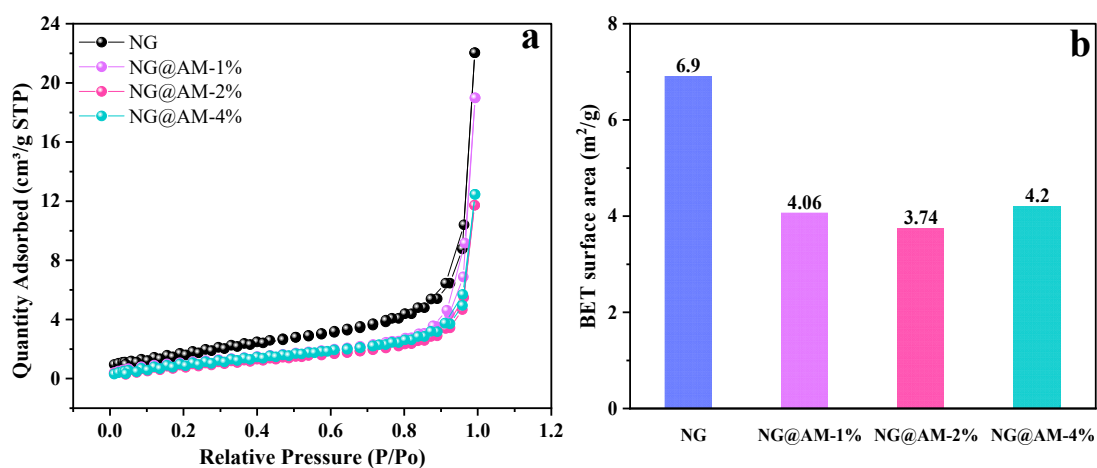

**Figure S3.** (a) The nitrogen adsorption-desorption isotherms and (b) the BET surface area of the pristine NG, NG@AM-1%, NG@AM-2% and NG@AM-4% electrodes.

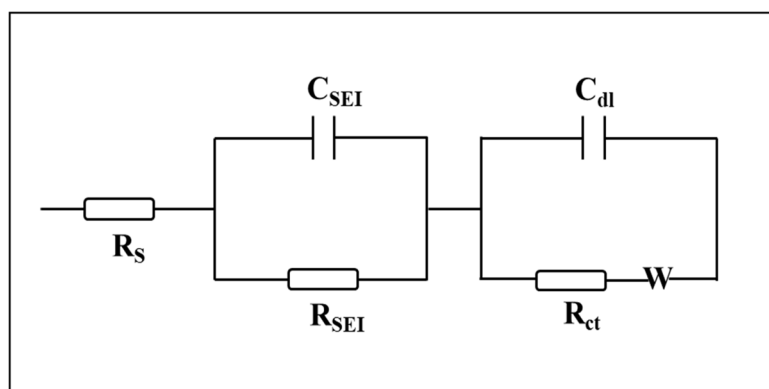

**Figure S4.** The equivalent circuit for fitting the EIS.

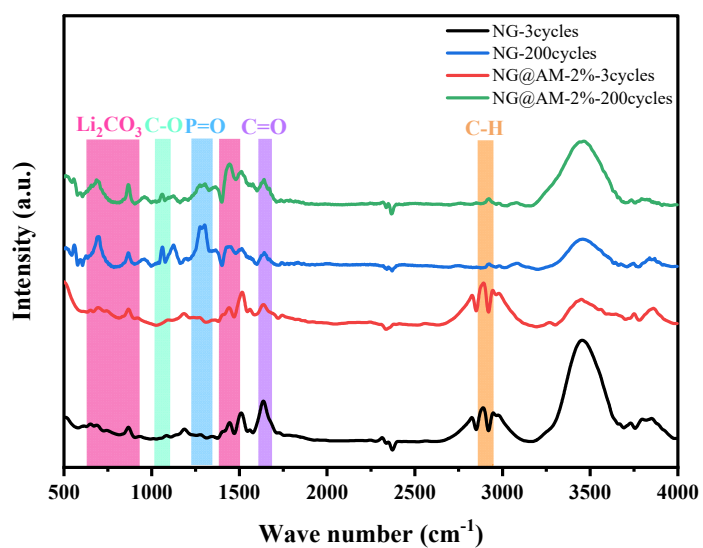

**Figure S5.** The FTIR spectra of the pristine NG and NG@AM-2% anodes at different electrochemical stages.

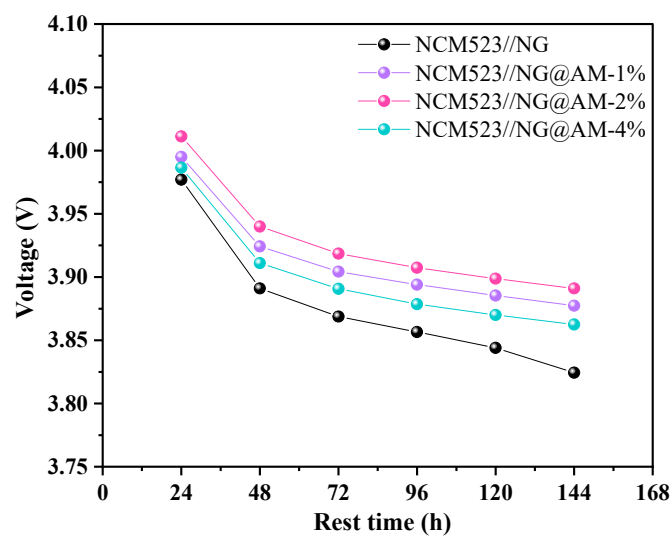

**Figure S6.** Plot of voltage varies with rest time for full cells with different NG anodes stored at 25°C.

**Table S1.** The charge/discharge specific capacity (CSC/DSC) and initial coulombic efficiency of different NG anodes in the first cycle.

| Samples  | CSC (mAh g <sup>-1</sup> ) | DSC (mAh g <sup>-1</sup> ) | ICE (%) |
|----------|----------------------------|----------------------------|---------|
| NG       | 378.52                     | 323.82                     | 85.55   |
| NG@AM-1% | 385.07                     | 339.45                     | 88.15   |
| NG@AM-2% | 398.92                     | 356.28                     | 89.31   |
| NG@AM-4% | 399.04                     | 348.88                     | 87.43   |

**Table S2.** The corresponding resistance values of the pristine NG and NG grafted with different amounts of the AM polymer anodes after the 3 formation cycles.

| R (Ω cm <sup>2</sup> ) | R <sub>s</sub> | R <sub>SEI</sub> | R <sub>CT</sub> |
|------------------------|----------------|------------------|-----------------|
| NG                     | 1.24           | 4.13             | 39.48           |
| NG@AM-1%               | 1.74           | 6.04             | 45.42           |
| NG@AM-2%               | 1.48           | 9.73             | 42.64           |
| NG@AM-4%               | 2.32           | 18.34            | 39.95           |

**Table S3.** The corresponding resistance values of the pristine NG and NG grafted with different amounts of the AM polymer anodes after the rate test.

| R ( $\Omega \text{ cm}^2$ ) | R <sub>s</sub> | R <sub>SEI</sub> | R <sub>CT</sub> |
|-----------------------------|----------------|------------------|-----------------|
| NG                          | 2.07           | 4.21             | 8.04            |
| NG@AM-1%                    | 1.59           | 2.16             | 4.30            |
| NG@AM-2%                    | 1.58           | 2.01             | 3.44            |
| NG@AM-4%                    | 1.61           | 2.87             | 4.87            |

**Table S4.** The corresponding resistance values of the pristine NG and NG grafted with different amounts of the AM polymer anodes after the 200 cycles.

| R ( $\Omega \text{ cm}^2$ ) | R <sub>s</sub> | R <sub>SEI</sub> | R <sub>CT</sub> |
|-----------------------------|----------------|------------------|-----------------|
| NG                          | 11.68          | 23.02            | 45.06           |
| NG@AM-1%                    | 2.79           | 8.95             | 12.18           |
| NG@AM-2%                    | 2.17           | 4.21             | 8.04            |
| NG@AM-4%                    | 5.41           | 6.41             | 15.48           |

**Table S5.** The first charge/discharge specific capacity, initial coulombic efficiency and capacity retention (CR) after 500 cycles of full cells with different NG anodes.

| Samples  | CSC (mAh g <sup>-1</sup> ) | DSC (mAh g <sup>-1</sup> ) | ICE (%) | CR (500th) |
|----------|----------------------------|----------------------------|---------|------------|
| NG       | 201.5                      | 160.4                      | 79.60   | 73.50%     |
| NG@AM-1% | 212.9                      | 174.6                      | 82.01   | 79.23%     |
| NG@AM-2% | 216.4                      | 178.2                      | 82.35   | 82.75%     |
| NG@AM-4% | 211.9                      | 173.2                      | 81.74   | 80.73%     |

**Table S6.** The K-values and self-discharge rates ( $\eta$ ) of full cells with different NG anodes at 25/50°C.

|                  | NCM523//NG | NCM523//NG<br>@AM-1% | NCM523//NG<br>@AM-2% | NCM523//NG<br>@AM-4% |
|------------------|------------|----------------------|----------------------|----------------------|
| K-25°C<br>(mV/h) | 1.27       | 0.98                 | 1.01                 | 1.03                 |
| $\eta$ -25°C (%) | 8.57       | 7.24                 | 6.61                 | 3.64                 |
| $\eta$ -50°C (%) | 12.27      | 11.66                | 5.62                 | 3.52                 |
